# Supplementary material for: A novel LEuH/PVA luminescent hydrogel with ammonia response and self-recovery luminescence behavior
Source: Royal Society of Chemistry journal article supplement (doi:10.1039/c9nj00446g), 2019-01-01
Supplement: c9nj00446g1.pdf [file c9nj00446g1.pdf]

**Electronic Supplementary Information**

**A novel LEuH/PVA luminescent hydrogel with ammonia response and self-recovery luminescence behavior**

Yuan Wang<sup>a</sup>, Wenjun Zhang<sup>\*a</sup>, Jinglin Li<sup>a</sup> and Jie Fu<sup>a</sup>

<sup>a</sup> *School of Chemical Engineering, Hebei University of Technology, Tianjin 300130, China*

*\*Corresponding author at: School of Chemical Engineering, Hebei University of Technology, Tianjin 300130, China. E-mail: wjzhang@hebut.edu.cn; Fax: +86 022 6020 4294*

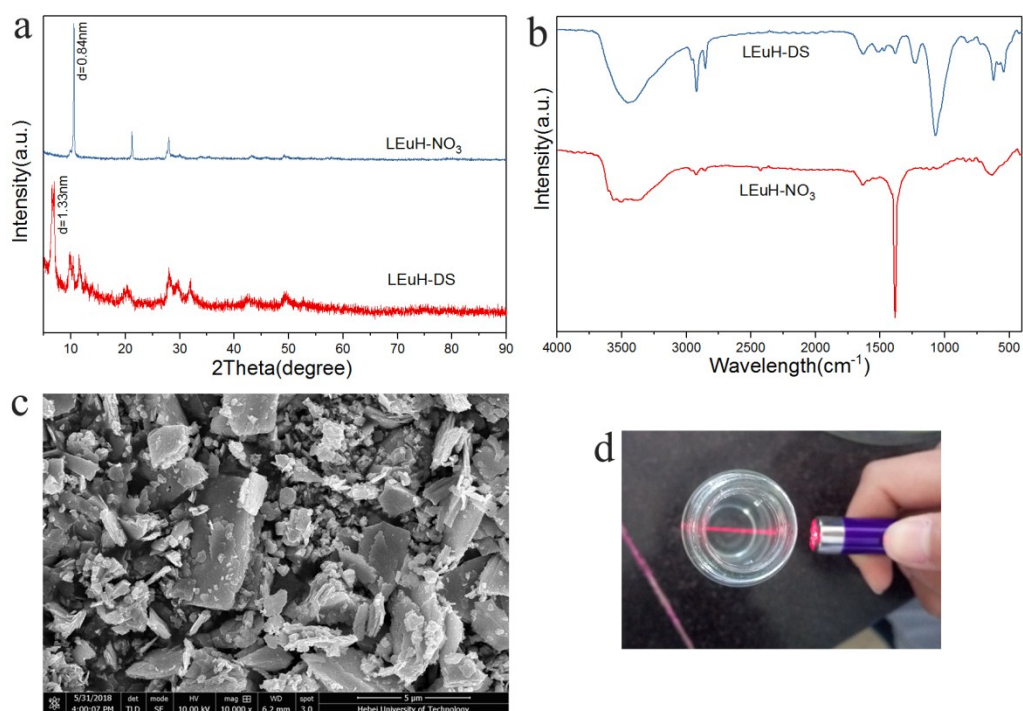

Figure S1 (a)XRD patterns of LEuH-NO<sub>3</sub> and LEuH-DS. (b) FT-IR spectra of of LEuH-NO<sub>3</sub> and LEuH-DS. (c) SEM images of LEuH-NO<sub>3</sub>. (d) Photograph of the colloidal suspension of LEuH in formamide that displays the Tyndall effect.

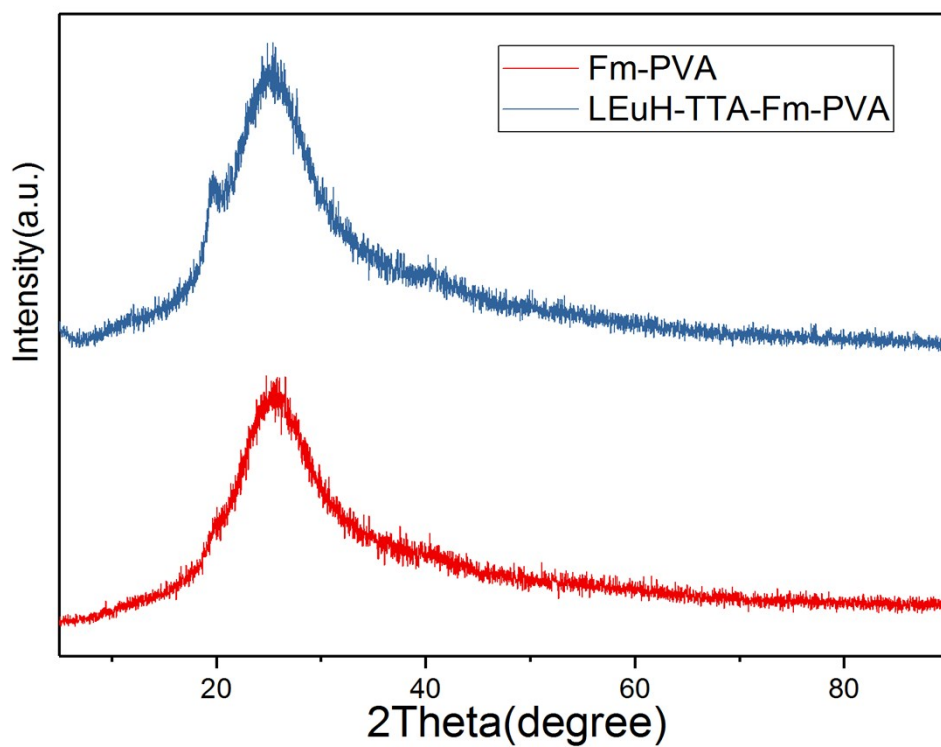

Figure S2 XRD patterns of Fm/PVA and LEuH-TTA-Fm/PVA.

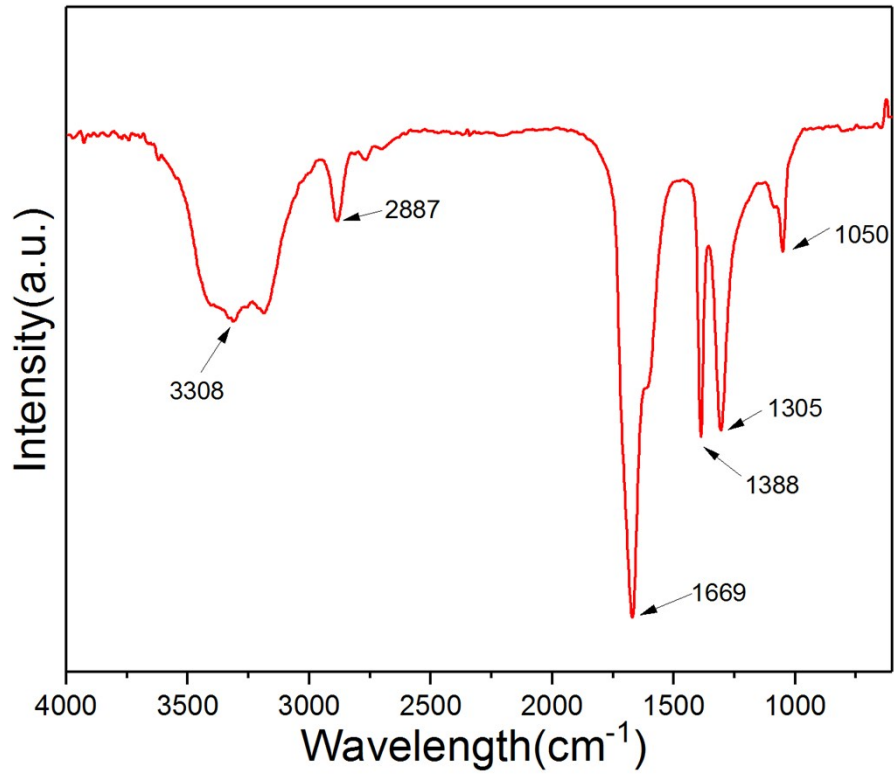

Figure S3 FTIR spectrum of LEuH-TTA-Fm/PVA.

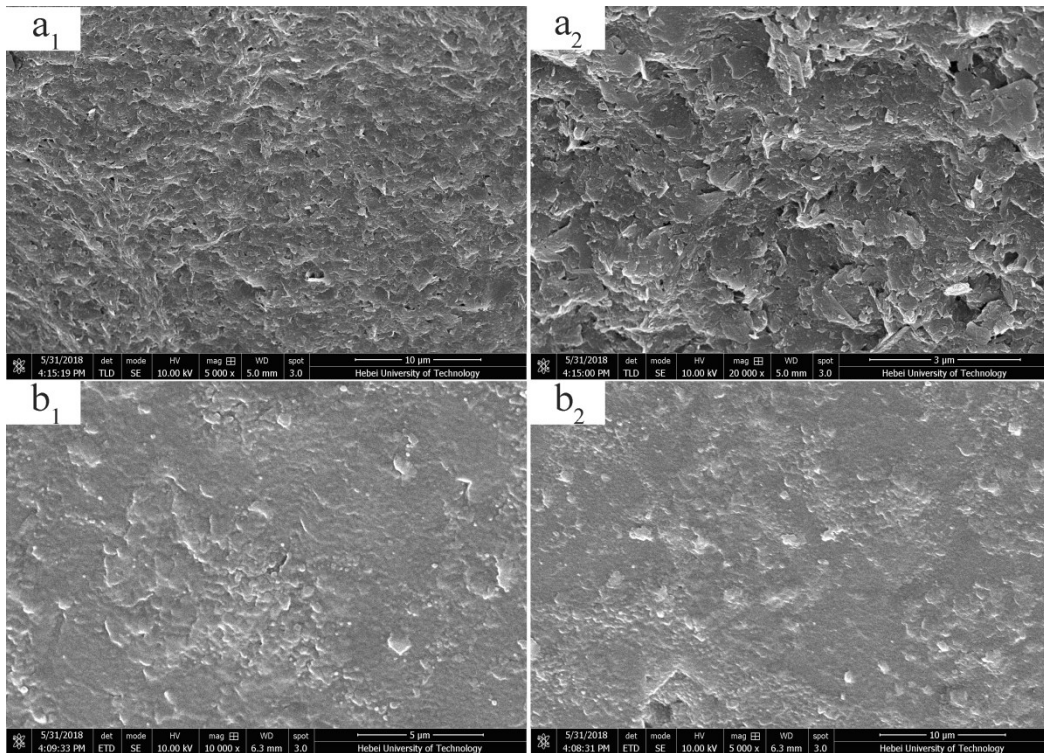

Figure S4 SEM images of (a) Fm/PVA and (b) LEuH-TTA-Fm/PVA

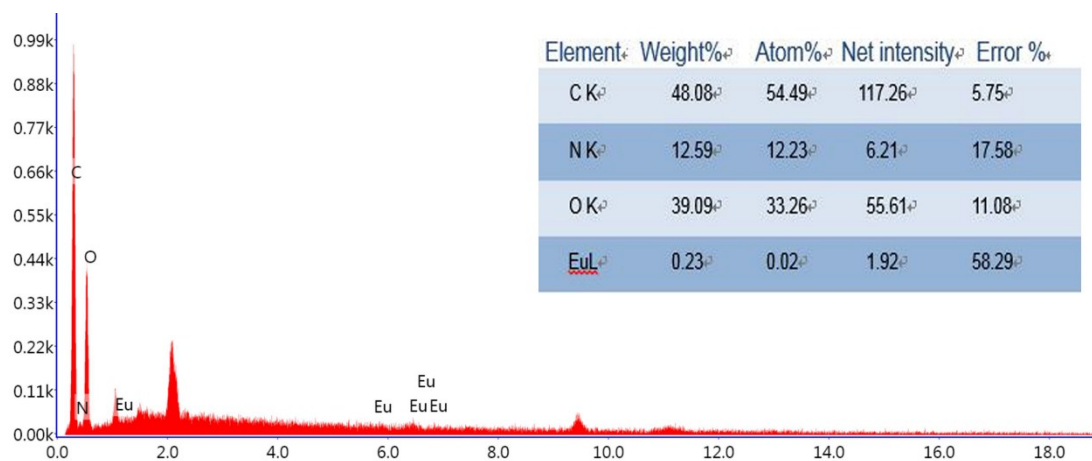

Figure S5 EDS spectrum of LEuH-TTA-Fm/PVA.

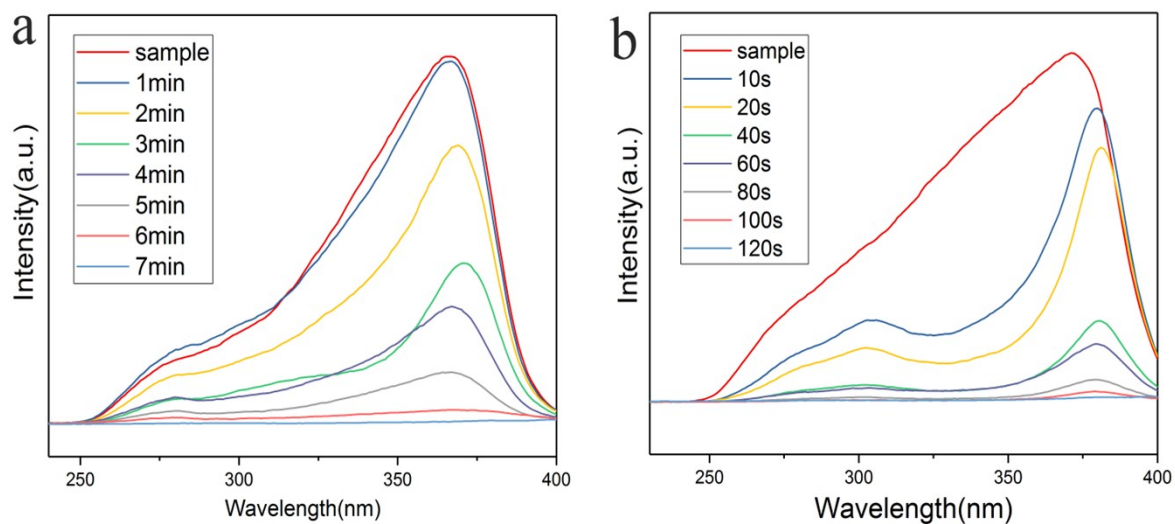

Figure S6 Excitation spectra showing the intensity changes monitored at 619 nm of LEuH-TTA-Fm/PVA in ammonia gas (a) and solution (b).

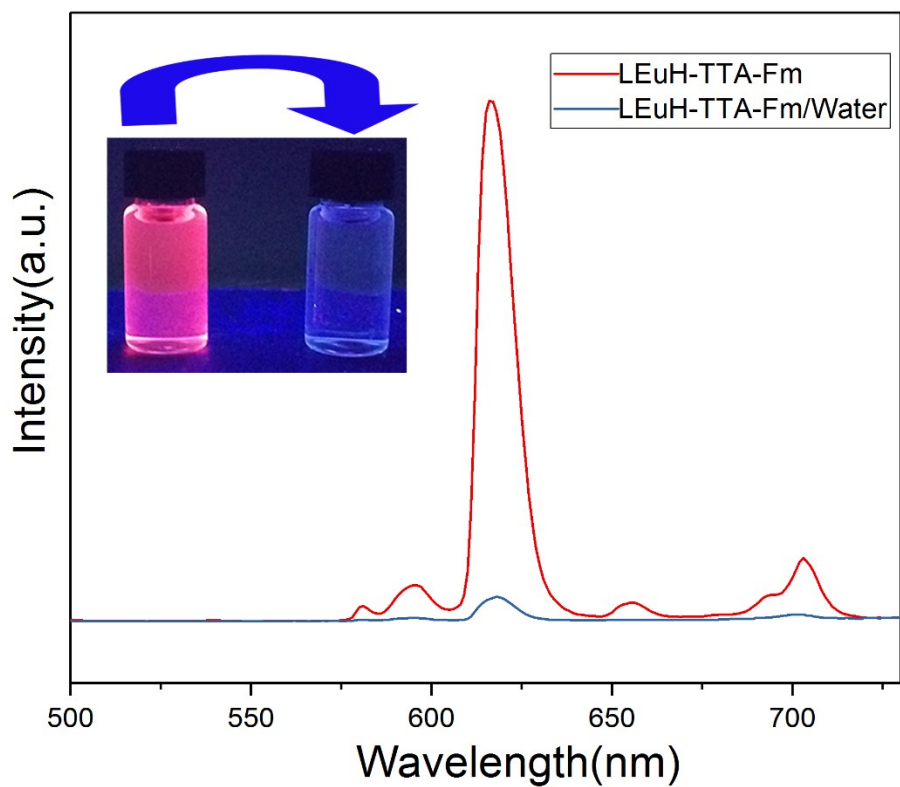

Figure S7 fluorescence quenching experiments of Eu(TTA) formamide solution caused by water

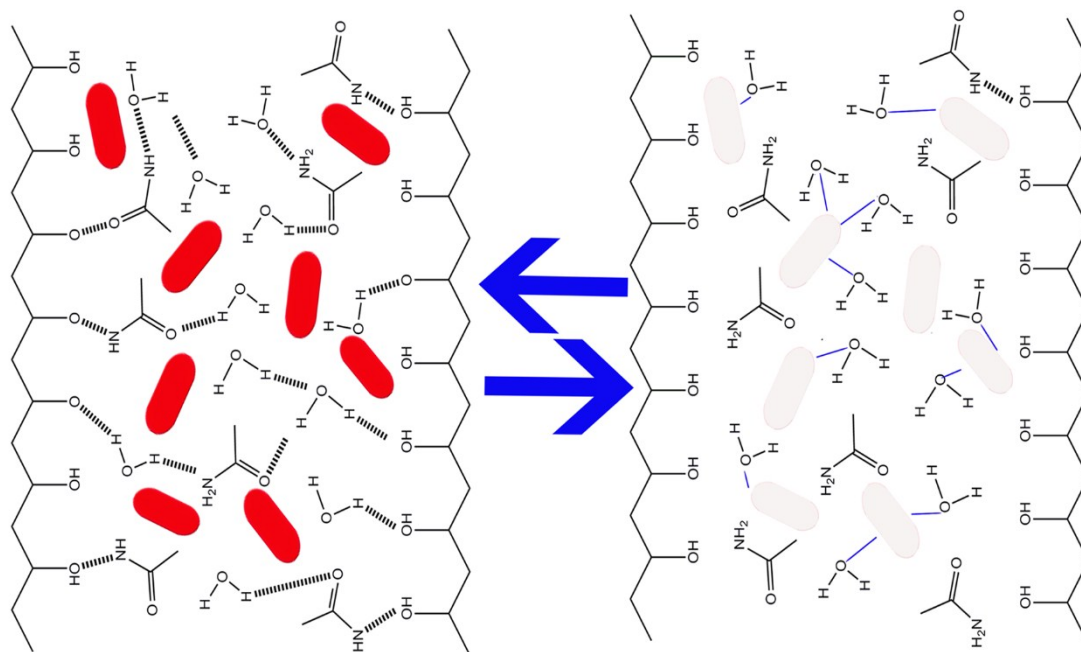

Scheme 1 The possible internal structure of LEuH-TTA-Fm/PVA hydrogel.
